# Supplementary material for: Sn-Doped Hydrated V2O5 Cathode Material with Enhanced Rate and Cycling Properties for Zinc-Ion Batteries
Source: MDPI journal article supplement (doi:10.3390/cryst12111617), 2022-11-11
Supplement: s1 [file s1]

---

# **Sn-doped Hydrated V<sub>2</sub>O<sub>5</sub> Cathode Material with Enhanced Rate and Cycling Properties for Zinc-Ion Batteries**

Kai Guo<sup>1,2</sup>, Wenchong Cheng<sup>1</sup>, Haiyuan Liu<sup>1</sup>, Wenhao She<sup>1</sup>, Yinpeng Wan<sup>1</sup>, Heng Wang<sup>1</sup>, Hanbin Li<sup>1</sup>, Zidan Li<sup>1</sup>, Xing Zhong<sup>1</sup>, Jinbo Ouyang<sup>1,\*</sup>, Neng Yu<sup>1,\*</sup>

<sup>1</sup>Jiangxi Province Engineering Research Center of New Energy Technology and Equipment, School of Chemistry, Biology and Materials Science, East China University of Technology, Nanchang 330013, P. R.China

<sup>2</sup>State Key Laboratory of Materials Processing and Die & Mould Technology, Huazhong University of Science and Technology, Wuhan 430074, P. R.China

\*Corresponding Author:

oyjb1001@163.com (Jinbo Ouyang)

neng063126@ecut.edu.cn (Neng Yu)

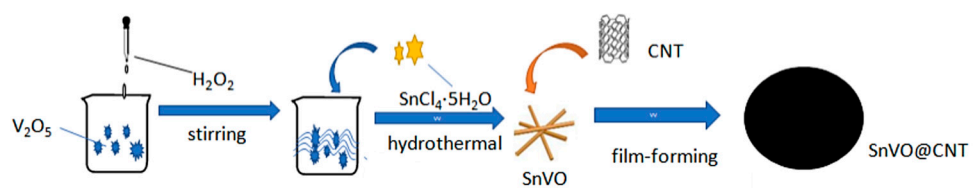

Figure S1. Scheme of synthesis of SnVOH

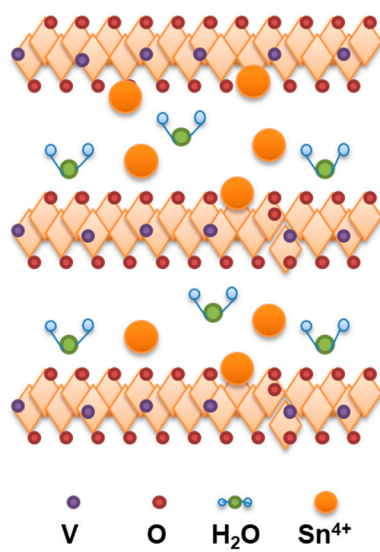

Figure S2. The schematic crystalline structure of SnVOH

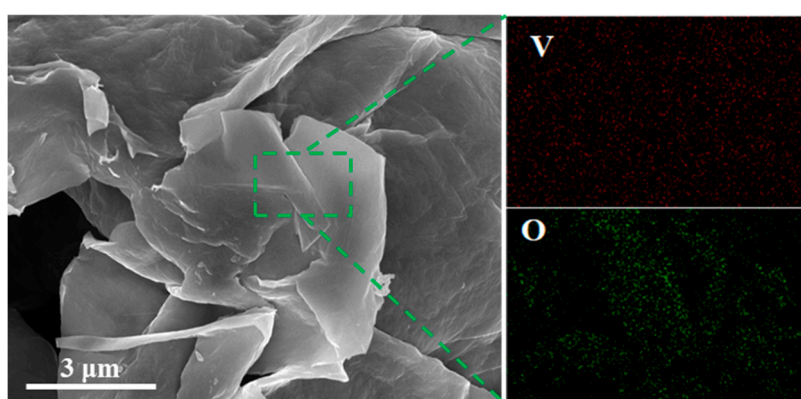

Figure S3. EDS characterization of VOH sample.

Table S1. The molar ratio of different elements in SnVOH

| Map Sum Spectrum |        |         |
|------------------|--------|---------|
| Element          | Wt%    | Atomic% |
| O                | 36.33  | 67.79   |
| V                | 48.36  | 28.36   |
| Sn               | 15.31  | 3.85    |
| Total:           | 100.00 | 100.00  |

The interplanar distance  $d$  of (001) plane is calculated with the Bragg Equation:

$$d_{001} = \lambda / 2 \sin \theta \quad (1)$$

The wave length of Cu  $K\alpha$  ray  $\lambda$  is 0.154178 nm.

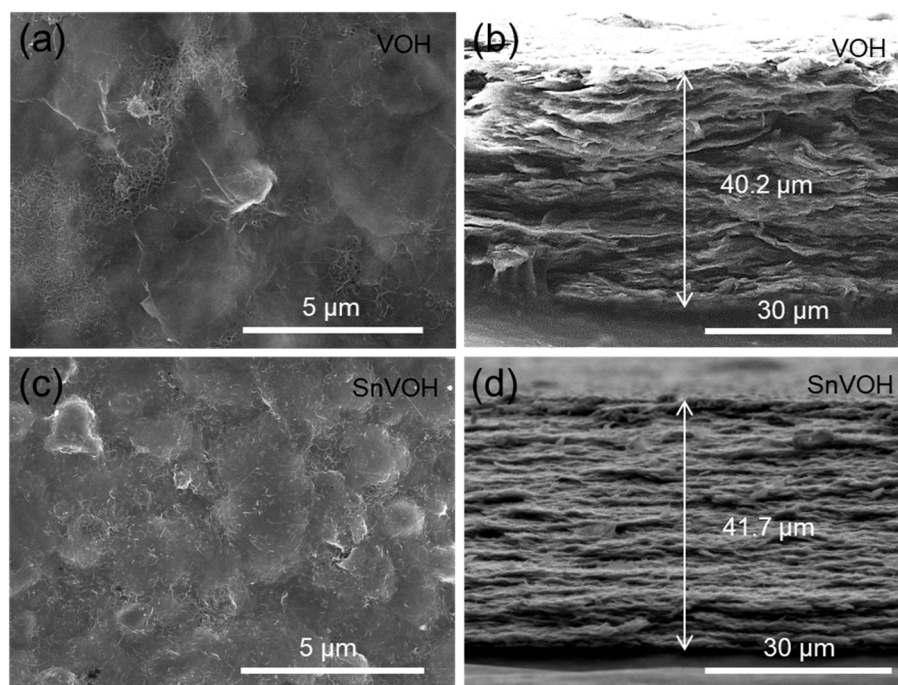

Figure S4. Characterization of VOH and SnVOH composite cathodes. (a) Top and (b) side-view SEM of VOH-based cathode. (c) Top and (d) side-view SEM of SnVOH-based cathode.

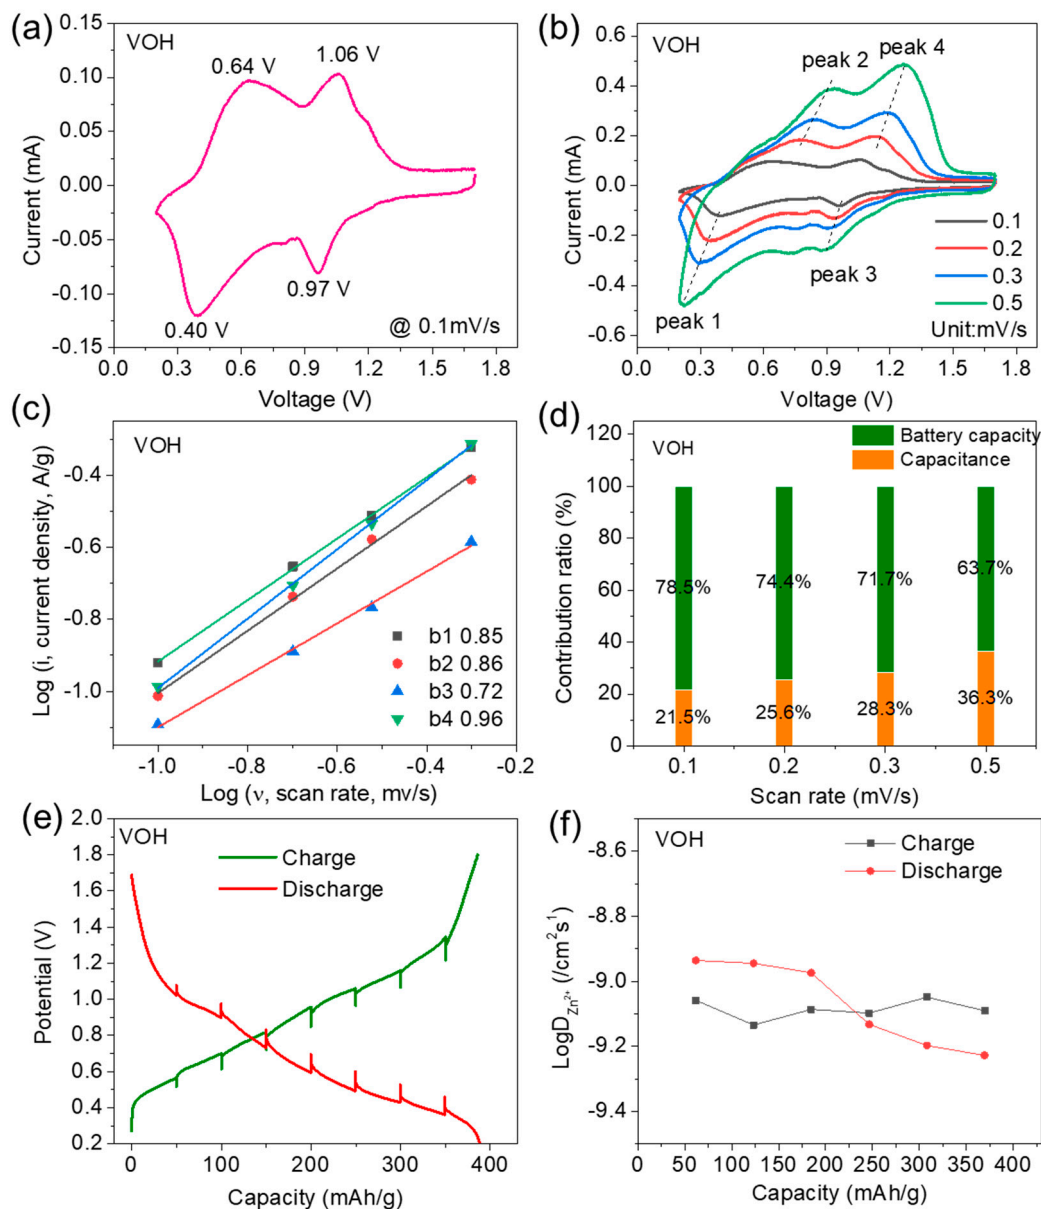

Figure S5. Electrochemical characterization of VOH-based cathode. (a) CV profile at the scan rate of 0.1 mV/s, (b) CV curves at the scan rate from 0.1 to 0.5 mV/s, (c)  $\log(\text{current})$  vs.  $\log(\text{scan rate})$  plots of four peaks in CV curves during the cycles, (d) capacity contribution ratios of battery type capacity and capacitance, (e) GITT profile of VOH, (f)  $\text{Zn}^{2+}$  diffusion coefficient in the VOH.

Table S2. Electrochemical performance comparison of SnVOH with recent literature data on doped hydrated V<sub>2</sub>O<sub>5</sub>-based cathodes in ZIBs.

| Cathode Material                                                                 | Specific capacity                                   | Rate performance                                   | Cycle performance                                                                         | Ref.      |
|----------------------------------------------------------------------------------|-----------------------------------------------------|----------------------------------------------------|-------------------------------------------------------------------------------------------|-----------|
| SnVOH                                                                            | 376 mAhg <sup>-1</sup><br>at 0.1 Ag <sup>-1</sup>   | 290 mAhg <sup>-1</sup><br>at 10 Ag <sup>-1</sup>   | 135%, 500 cycles<br>at 10 Ag <sup>-1</sup> ;<br>71%, 2500 cycles<br>at 5 Ag <sup>-1</sup> | This work |
| Mn <sub>0.15</sub> V <sub>2</sub> O <sub>5</sub> ·nH <sub>2</sub> O              | 367 mAhg <sup>-1</sup><br>at 0.1 Ag <sup>-1</sup>   | 150 mAhg <sup>-1</sup><br>at 10 Ag <sup>-1</sup>   | 150% (153 mAhg <sup>-1</sup> ), 8000 cycles at<br>10 Ag <sup>-1</sup>                     | 1         |
| Fe <sub>x</sub> V <sub>2</sub> O <sub>5</sub> ·nH <sub>2</sub> O                 | 311.1 mAhg <sup>-1</sup><br>at 0.1 Ag <sup>-1</sup> | 201.6 mAhg <sup>-1</sup><br>at 3 Ag <sup>-1</sup>  | 88.7%, 1500<br>cycles at 2 Ag <sup>-1</sup>                                               | 2         |
| (NH <sub>4</sub> ) <sub>x</sub> V <sub>2</sub> O <sub>5</sub> ·nH <sub>2</sub> O | 388 mAhg <sup>-1</sup><br>at 0.5 Ag <sup>-1</sup>   | 104 mAhg <sup>-1</sup><br>at 5 Ag <sup>-1</sup>    | 53%, 400 cycles at<br>2Ag <sup>-1</sup>                                                   | 3         |
| Mg <sub>0.34</sub> V <sub>2</sub> O <sub>5</sub> ·0.84H <sub>2</sub> O           | 353 mAhg <sup>-1</sup><br>at 0.5 Ag <sup>-1</sup>   | 81 mAhg <sup>-1</sup> at<br>5 Ag <sup>-1</sup>     | 97%, 2000 cycles<br>at 5 Ag <sup>-1</sup>                                                 | 4         |
| Na <sub>x</sub> V <sub>2</sub> O <sub>5</sub> ·nH <sub>2</sub> O                 | 459.1 mAhg <sup>-1</sup><br>at 0.5 Ag <sup>-1</sup> | 352.5 mAhg <sup>-1</sup><br>at 10 Ag <sup>-1</sup> | 83.1%, 1800<br>cycles at 10 Ag <sup>-1</sup>                                              | 5         |
| Ca <sub>x</sub> V <sub>2</sub> O <sub>5</sub> ·nH <sub>2</sub> O                 | 310 mAhg <sup>-1</sup><br>at 0.5 Ag <sup>-1</sup>   | 88 mAhg <sup>-1</sup> at<br>15 Ag <sup>-1</sup>    | 91.7%, 3000<br>cycles at 10 Ag <sup>-1</sup>                                              | 6         |
| Zn <sub>0.25</sub> V <sub>2</sub> O <sub>5</sub> ·H <sub>2</sub> O               | 300 mAhg <sup>-1</sup><br>at 0.11 Ag <sup>-1</sup>  | 175 mAhg <sup>-1</sup><br>at 2.5 Ag <sup>-1</sup>  | 92%, 200 cycles at<br>0.5 Ag <sup>-1</sup>                                                | 7         |
| Li <sub>0.25</sub> V <sub>2</sub> O <sub>5</sub> ·H <sub>2</sub> O               | 470 mAhg <sup>-1</sup><br>at 0.5 Ag <sup>-1</sup>   | 170 mAhg <sup>-1</sup><br>at 10 Ag <sup>-1</sup>   | 64%, 1000 cycles<br>at 10 Ag <sup>-1</sup>                                                | 8         |

---

## References

1. Geng, H.; Cheng, M.; Wang, B.; Yang, Y.; Zhang, Y.; Li, C. C., Electronic Structure Regulation of Layered Vanadium Oxide via Interlayer Doping Strategy toward Superior High-Rate and Low-Temperature Zinc-Ion Batteries. *Advanced Functional Materials* **2019**, *30* (6), 1907684.
2. Wu, F.; Wang, Y.; Ruan, P.; Niu, X.; Zheng, D.; Xu, X.; Gao, X.; Cai, Y.; Liu, W.; Shi, W.; Cao, X., Fe-doping enabled a stable vanadium oxide cathode with rapid Zn diffusion channel for aqueous zinc-ion batteries. *Materials Today Energy* **2021**, *21*, 100842.
3. Zhao, H.; Fu, Q.; Yang, D.; Sarapulova, A.; Pang, Q.; Meng, Y.; Wei, L.; Ehrenberg, H.; Wei, Y.; Wang, C.; Chen, G., In Operando Synchrotron Studies of  $\text{NH}_4^+$  Preintercalated  $\text{V}_2\text{O}_5 \cdot n\text{H}_2\text{O}$  Nanobelts as the Cathode Material for Aqueous Rechargeable Zinc Batteries. *ACS Nano* **2020**, *14* (9), 11809-11820.
4. Ming, F.; Liang, H.; Lei, Y.; Kandambeth, S.; Eddaoudi, M.; Alshareef, H. N., Layered  $\text{Mg}_x\text{V}_2\text{O}_5 \cdot n\text{H}_2\text{O}$  as Cathode Material for High-Performance Aqueous Zinc Ion Batteries. *ACS Energy Letters* **2018**, *3* (10), 2602-2609.
5. Xu, G.; Liu, X.; Huang, S.; Li, L.; Wei, X.; Cao, J.; Yang, L.; Chu, P. K., Freestanding, Hierarchical, and Porous Bilayered  $\text{Na}_x\text{V}_2\text{O}_5 \cdot n\text{H}_2\text{O}/\text{rGO}/\text{CNT}$  Composites as High-Performance Cathode Materials for Nonaqueous K-Ion Batteries and Aqueous Zinc-Ion Batteries. *ACS Appl Mater Interfaces* **2020**, *12* (1), 706-716.
6. Jiang, H.; Zhang, Y.; Xu, L.; Gao, Z.; Zheng, J.; Wang, Q.; Meng, C.; Wang, J., Fabrication of  $(\text{NH}_4)_2\text{V}_3\text{O}_8$  nanoparticles encapsulated in amorphous carbon for high capacity electrodes in aqueous zinc ion batteries. *Chemical Engineering Journal* **2020**, *382*, 122844.
7. Venkatesan, R.; Bauri, R.; Mayuranathan, K. K., Zinc Vanadium Oxide Nanobelts as High-Performance Cathodes for Rechargeable Zinc-Ion Batteries. *Energy & Fuels* **2022**, *36* (14), 7854-7864.
8. Yang, Y.; Tang, Y.; Fang, G.; Shan, L.; Guo, J.; Zhang, W.; Wang, C.; Wang, L.; Zhou, J.; Liang, S.,  $\text{Li}^+$  intercalated  $\text{V}_2\text{O}_5 \cdot n\text{H}_2\text{O}$  with enlarged layer spacing and fast ion diffusion as an aqueous zinc-ion battery cathode. *Energy & Environmental Science* **2018**, *11* (11), 3157-3162.
